# Supplementary material for: United Nations, 1945-1995
Source: Royal Society of Chemistry journal article supplement (doi:10.1039/c9ra04258j), 1995-10-15
Supplement: c9ra04258j1.pdf [file c9ra04258j1.pdf]

# Supporting Information

## Investigation of the intramolecular hydrogen bonding interactions and excited state proton transfer mechanism for both Br-BTN and CN-BTN systems

Dapeng Yang<sup>1,2\*</sup>, Qiaoli Zhang<sup>1</sup>, Xiaoyan Song<sup>1</sup>, Tianjie Zhang<sup>1</sup>

1. College of Physics and Electronics, North China University of Water Resources and Electric Power, Zhengzhou 450046, P. R. China

2. State Key Laboratory of Molecular Reaction Dynamics, Theoretical and Computational Chemistry, Dalian Institute of Chemical Physics, Chinese Academy of Sciences, Dalian 116023, P. R. China

Corresponding author: Dapeng Yang, email: [dpyang\\_ncwu@163.com](mailto:dpyang_ncwu@163.com)

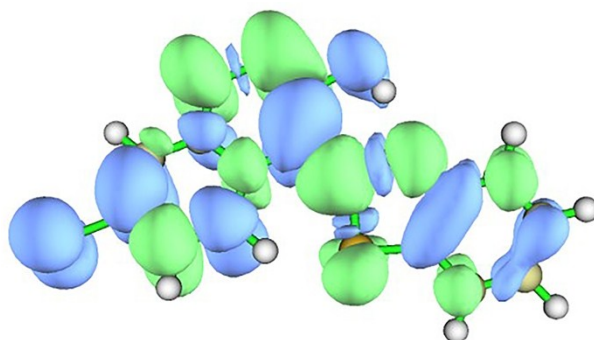

**Br-BTN-enol**

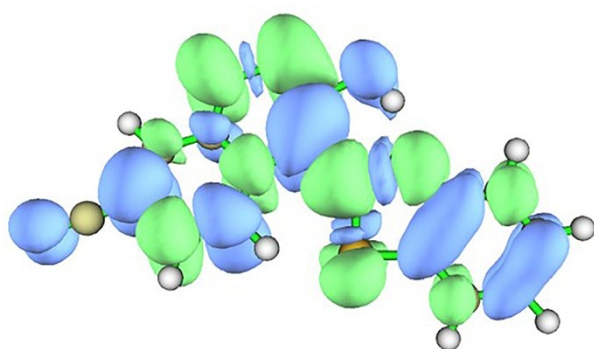

**CN-BTN-enol**

Figure S1. View of the CDD maps for both Br-BTN-enol and CN-BTN-enol systems. Herein, the regions with regions with the increasing electron density are shown in green, and those with decreasing electron density are shown in light blue.

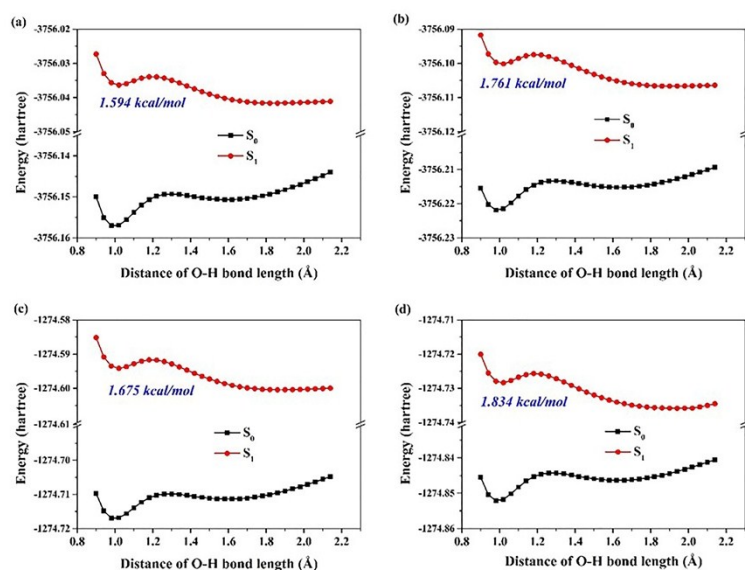

Figure S2. The constructed potential energy curves for both Br-BTN and CN-BTN systems based on fixing O-H bond length in both  $S_0$  and  $S_1$  states. (a) and (b) show the results of potential energy curves for Br-BTN system using Cam-B3LYP and wB97XD functionals, respectively. (c) and (d) show the results of potential energy curves for CN-BTN system using Cam-B3LYP and wB97XD functionals, respectively.

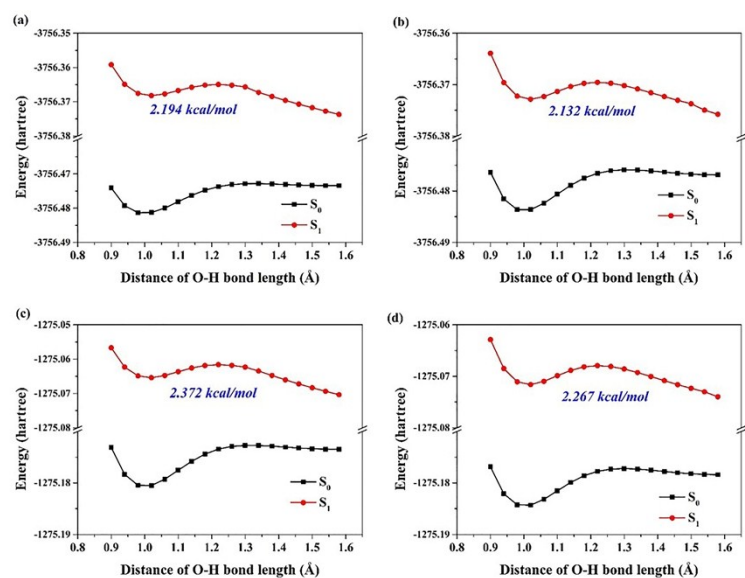

Figure S3. The constructed potential energy curves for both Br-BTN and CN-BTN systems based on fixing O-H bond length in both  $S_0$  and  $S_1$  states in cyclohexane and chloroform solvents. (a) and (b) show the results of potential energy curves for Br-BTN system in cyclohexane and chloroform solvents, respectively. (c) and (d) show the results of potential energy curves for CN-BTN system in cyclohexane and

chloroform solvents, respectively.

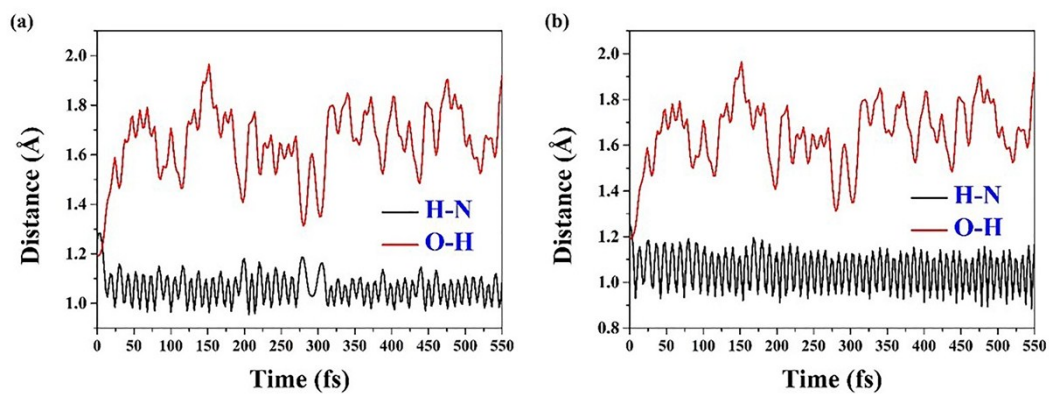

Figure S4. The time evolution of the important structural parameters (i.e., H-N and O-H bond lengths) for both Br-BTN (a) and CN-BTN (b) sampled by the excited state BOMD simulations.
